# Supplementary material for: Domestic Reutilization Status of Invasive Turtle Species in South Korea Based on Trachemys scripta
Source: MDPI journal article supplement (doi:10.3390/d15080885), 2023-07-26
Supplement: s1 [file s1]

**Table S1. Current import status of invasive alien turtles into South Korea from 2002 to 2022**

| Continent | Country                  | Year |    |    |    |    |    |    |    |    |    |    |    |    |    |    |    |    |    |    |    |    | Price (\$)              | Weight (kg)                |
|-----------|--------------------------|------|----|----|----|----|----|----|----|----|----|----|----|----|----|----|----|----|----|----|----|----|-------------------------|----------------------------|
|           |                          | 02   | 03 | 04 | 05 | 06 | 07 | 08 | 09 | 10 | 11 | 12 | 13 | 14 | 15 | 16 | 17 | 18 | 19 | 20 | 21 | 22 |                         |                            |
| Africa    | Zambia                   |      |    |    |    |    |    | ○  | ○  | ○  | ○  | ○  | ○  | ○  | ○  | ○  | ○  | ○  | ○  | ○  | ○  | ○  | 224,913 (14,994 ± 2393) | 1458.5 (97.2 ± 20.5)       |
|           | Kenya                    |      |    |    |    |    |    |    |    |    |    |    |    | ○  | ○  | ○  | ○  | ○  | ○  | ○  | ○  | ○  | 103,923 (11,547 ± 1830) | 490.5 (54.5 ± 23.6)        |
|           | Seychelles               |      |    |    |    |    |    |    |    | ○  |    | ○  |    |    |    | ○  | ○  | ○  |    | ○  | ○  |    | 71,784 (10,255 ± 5130)  | 327.0 (46.7 ± 28.3)        |
|           | Sudan                    |      |    |    |    |    | ○  | ○  | ○  | ○  |    | ○  | ○  | ○  | ○  | ○  |    |    |    |    |    |    | 54,476 (6053 ± 2193)    | 2170.0 (241.1 ± 41.3)      |
|           | Mauritius                |      |    |    |    |    |    |    |    |    |    |    |    |    |    |    | ○  | ○  | ○  |    | ○  | ○  | 48,584 (9717 ± 4443)    | 68.8 (13.8 ± 4.0)          |
|           | Ghana                    |      |    |    |    |    |    | ○  | ○  |    | ○  |    | ○  | ○  |    |    |    |    |    | ○  | ○  |    | 33,342 (4763 ± 1420)    | 229.0 (32.7 ± 8.2)         |
|           | Togo                     |      |    |    |    |    |    |    |    |    |    |    | ○  | ○  | ○  | ○  | ○  | ○  | ○  | ○  | ○  | ○  | 30,591 (3399 ± 816)     | 628.2 (69.8 ± 14.0)        |
|           | Egypt                    |      |    |    |    |    | ○  |    |    |    | ○  | ○  |    |    |    |    |    |    | ○  |    | ○  |    | 26,634 (5327 ± 3640)    | 344.0 (68.8 ± 34.1)        |
|           | Tanzania                 |      |    |    |    |    |    | ○  | ○  | ○  | ○  |    | ○  | ○  | ○  |    |    |    |    |    |    |    | 23,827 (3404 ± 881)     | 81.0 (11.6 ± 5.8)          |
|           | Republic of South Africa |      |    |    |    |    |    |    |    |    |    |    |    |    |    | ○  | ○  | ○  | ○  | ○  |    |    | 21,551 (4310 ± 2181)    | 47.6 (9.5 ± 6.4)           |
|           | Sierra Leone             |      |    |    |    |    |    |    |    |    |    |    |    |    |    |    |    |    |    |    | ○  |    | 19,015                  | 30.0                       |
|           | Nigeria                  |      |    |    |    |    |    |    | ○  |    |    |    |    |    |    | ○  | ○  |    |    |    | ○  |    | 6997 (1749 ± 998)       | 68.0 (17.0 ± 8.6)          |
|           | Congo                    |      |    |    |    |    |    |    |    |    |    |    |    |    |    | ○  |    |    |    |    | ○  | ○  | 5998 (1999 ± 1433)      | 27.1 (9.0 ± 8.5)           |
|           | Mali                     |      |    |    |    |    |    |    |    |    | ○  |    |    |    |    |    |    |    |    |    | ○  |    | 3434 (1717 ± 717)       | 125.0 (62.5 ± 57.5)        |
| Asia      | Benin                    |      |    |    |    |    | ○  | ○  |    |    |    |    |    |    | ○  |    |    | ○  | ○  |    |    |    | 2821 (564 ± 265)        | 17.0 (3.4 ± 0.7)           |
|           | Cameroon                 |      |    |    |    |    |    |    |    |    |    |    |    |    |    | ○  |    |    |    |    |    |    | 680                     | 15.0                       |
|           | China                    | ○    |    | ○  | ○  | ○  | ○  | ○  | ○  | ○  | ○  | ○  | ○  | ○  | ○  | ○  | ○  | ○  | ○  | ○  | ○  | ○  | 903,739 (45,187 ± 4099) | 110,691.8 (5534.6 ± 890.2) |
|           | Hong Kong                |      |    | ○  |    |    | ○  | ○  | ○  | ○  |    | ○  | ○  | ○  | ○  | ○  | ○  | ○  | ○  | ○  | ○  | ○  | 770,410 (48,151 ± 9205) | 2676.6 (167.3 ± 34.4)      |
|           | Taiwan                   |      |    | ○  | ○  | ○  | ○  | ○  | ○  | ○  | ○  | ○  | ○  | ○  | ○  | ○  | ○  | ○  | ○  | ○  | ○  | ○  | 510,995 (26,894 ± 4022) | 2272.4 (119.6 ± 34.3)      |
|           | Uzbekistan               |      |    |    |    |    |    |    |    |    |    |    |    |    | ○  | ○  | ○  | ○  | ○  | ○  | ○  | ○  | 235,952 (29,494 ± 8146) | 723.8 (90.5 ± 24.8)        |
|           | Indonesia                | ○    | ○  | ○  | ○  | ○  | ○  | ○  | ○  | ○  | ○  | ○  | ○  | ○  | ○  | ○  | ○  | ○  | ○  | ○  | ○  | ○  | 82,022 (3906 ± 728)     | 1283.7 (61.1 ± 21.0)       |
|           | Singapore                |      |    | ○  | ○  |    |    |    |    |    |    |    |    |    |    | ○  |    |    |    | ○  | ○  |    | 54,119 (10,824 ± 8952)  | 2079.5 (415.9 ± 374.0)     |
|           | Japan                    | ○    |    |    |    |    |    |    |    |    | ○  | ○  | ○  | ○  | ○  | ○  | ○  | ○  | ○  | ○  | ○  | ○  | 30,936 (2578 ± 1198)    | 238.5 (19.9 ± 15.1)        |
|           | Thailand                 |      | ○  | ○  | ○  | ○  | ○  | ○  | ○  | ○  | ○  | ○  | ○  | ○  | ○  | ○  |    |    |    | ○  | ○  |    | 30,866 (1816 ± 485)     | 661.1 (38.9 ± 17.2)        |
|           | Malaysia                 | ○    |    |    | ○  |    | ○  | ○  | ○  |    |    |    |    |    |    |    |    |    | ○  |    |    |    | 17,774 (2962 ± 2136)    | 297.0 (49.5 ± 23.8)        |
|           | India                    |      | ○  |    |    |    |    |    |    |    |    |    |    |    |    |    |    |    |    |    |    |    | 1629                    | 10.0                       |
|           | Vietnam                  |      |    |    |    |    |    |    |    |    |    | ○  |    |    |    |    |    |    | ○  |    |    |    | 1439 (720 ± 531)        | 6.0 (3.0 ± 2.0)            |

|               |                          |  |  |  |  |  |  |  |  |  |  |  |  |  |  |  |  |  |  |  |                              |                           |
|---------------|--------------------------|--|--|--|--|--|--|--|--|--|--|--|--|--|--|--|--|--|--|--|------------------------------|---------------------------|
|               | Sri Lanka                |  |  |  |  |  |  |  |  |  |  |  |  |  |  |  |  |  |  |  | 130                          | 0.0                       |
|               | Philippines              |  |  |  |  |  |  |  |  |  |  |  |  |  |  |  |  |  |  |  | 113                          | 4.0                       |
| Europe        | Germany                  |  |  |  |  |  |  |  |  |  |  |  |  |  |  |  |  |  |  |  | 310,558 (25,880 ± 3920)      | 135.3 (11.3 ± 1.5)        |
|               | Slovenia                 |  |  |  |  |  |  |  |  |  |  |  |  |  |  |  |  |  |  |  | 212,837 (26,605 ± 6425)      | 656.3 (82.0 ± 18.1)       |
|               | Italy                    |  |  |  |  |  |  |  |  |  |  |  |  |  |  |  |  |  |  |  | 188,698 (17,154 ± 4286)      | 168.8 (15.3 ± 5.3)        |
|               | France                   |  |  |  |  |  |  |  |  |  |  |  |  |  |  |  |  |  |  |  | 59,718 (6635 ± 2159)         | 36.7 (4.1 ± 2.1)          |
|               | Ukraine                  |  |  |  |  |  |  |  |  |  |  |  |  |  |  |  |  |  |  |  | 52,728 (6591 ± 1317)         | 127.0 (15.9 ± 3.6)        |
|               | United Kingdom           |  |  |  |  |  |  |  |  |  |  |  |  |  |  |  |  |  |  |  | 31,096 (6219 ± 2401)         | 10.7 (2.1 ± 1.3)          |
|               | Macedonia                |  |  |  |  |  |  |  |  |  |  |  |  |  |  |  |  |  |  |  | 27,554 (5511 ± 1158)         | 54.0 (10.8 ± 4.7)         |
|               | Netherlands              |  |  |  |  |  |  |  |  |  |  |  |  |  |  |  |  |  |  |  | 22,691 (2269 ± 853)          | 130.5 (13.1 ± 6.9)        |
|               | Spain                    |  |  |  |  |  |  |  |  |  |  |  |  |  |  |  |  |  |  |  | 15,474 (3869 ± 2218)         | 10.0 (2.5 ± 1.1)          |
|               | Croatia                  |  |  |  |  |  |  |  |  |  |  |  |  |  |  |  |  |  |  |  | 6172                         | 2.0                       |
|               | Czech                    |  |  |  |  |  |  |  |  |  |  |  |  |  |  |  |  |  |  |  | 5173 (1293 ± 723)            | 14.5 (3.6 ± 1.4)          |
|               | Belgium                  |  |  |  |  |  |  |  |  |  |  |  |  |  |  |  |  |  |  |  | 1287                         | 1.0                       |
|               | Slovakia                 |  |  |  |  |  |  |  |  |  |  |  |  |  |  |  |  |  |  |  | 1230 (615 ± 50)              | 10.5 (5.3 ± 2.8)          |
|               | Poland                   |  |  |  |  |  |  |  |  |  |  |  |  |  |  |  |  |  |  |  | 440                          | 0.4                       |
|               | Iceland                  |  |  |  |  |  |  |  |  |  |  |  |  |  |  |  |  |  |  |  | 110                          | 1.0                       |
| Middle East   | Jordan                   |  |  |  |  |  |  |  |  |  |  |  |  |  |  |  |  |  |  |  | 57,323 (5211 ± 947)          | 476.1 (43.3 ± 16.6)       |
|               | Syria                    |  |  |  |  |  |  |  |  |  |  |  |  |  |  |  |  |  |  |  | 19,700 (9850 ± 8350)         | 205.0 (102.5 ± 62.5)      |
|               | Türkiye                  |  |  |  |  |  |  |  |  |  |  |  |  |  |  |  |  |  |  |  | 13,650 (6825 ± 872)          | 4.0 (2.0 ± 0.0)           |
|               | Kuwait                   |  |  |  |  |  |  |  |  |  |  |  |  |  |  |  |  |  |  |  | 13,289 (4430 ± 396)          | 90.0 (30.0 ± 10.4)        |
|               | Saudi Arabia             |  |  |  |  |  |  |  |  |  |  |  |  |  |  |  |  |  |  |  | 3000                         | 12.0                      |
| North America | United States of America |  |  |  |  |  |  |  |  |  |  |  |  |  |  |  |  |  |  |  | 7,978,493 (379,928 ± 32,283) | 31,474.8 (1498.8 ± 368.5) |
|               | Canada                   |  |  |  |  |  |  |  |  |  |  |  |  |  |  |  |  |  |  |  | 32,898 (2991 ± 963)          | 102.0 (9.3 ± 2.2)         |
|               | Belize                   |  |  |  |  |  |  |  |  |  |  |  |  |  |  |  |  |  |  |  | 1810                         | 7.0                       |
| South America | El Salvador              |  |  |  |  |  |  |  |  |  |  |  |  |  |  |  |  |  |  |  | 135,553 (12,323 ± 2,432)     | 358.2 (32.6 ± 9.5)        |
|               | Brazil                   |  |  |  |  |  |  |  |  |  |  |  |  |  |  |  |  |  |  |  | 94,109 (9411 ± 3556)         | 172.2 (17.2 ± 4.6)        |
|               | Colombia                 |  |  |  |  |  |  |  |  |  |  |  |  |  |  |  |  |  |  |  | 78,494 (15,699 ± 7658)       | 160.3 (32.1 ± 11.9)       |
|               | Mexico                   |  |  |  |  |  |  |  |  |  |  |  |  |  |  |  |  |  |  |  | 33,287 (6657 ± 4136)         | 57.3 (11.5 ± 7.3)         |
|               | Peru                     |  |  |  |  |  |  |  |  |  |  |  |  |  |  |  |  |  |  |  | 20,530 (3422 ± 1060)         | 30.0 (5.0 ± 1.8)          |
|               | Uruguay                  |  |  |  |  |  |  |  |  |  |  |  |  |  |  |  |  |  |  |  | 13,109 (2622 ± 589)          | 20.1 (4.0 ± 1.4)          |
|               | Suriname                 |  |  |  |  |  |  |  |  |  |  |  |  |  |  |  |  |  |  |  | 10,000 (1000 ± 231)          | 31.1 (3.1 ± 2.2)          |

|           |   |   |   |   |   |   |   |   |   |                   |                   |                  |
|-----------|---|---|---|---|---|---|---|---|---|-------------------|-------------------|------------------|
| Guyana    | ○ |   |   | ○ | ○ | ○ | ○ |   | ○ | 7705 (1284 ± 353) | 46.6 (7.8 ± 5.5)  |                  |
| Barbados  |   | ○ | ○ |   |   |   |   |   | ○ | 6636 (2212 ± 564) | 24.0 (8.0 ± 4.0)  |                  |
| Venezuela |   |   |   | ○ | ○ |   |   |   | ○ | ○                 | 5239 (1310 ± 553) | 4.2 (1.1 ± 0.6)  |
| Nicaragua |   |   |   | ○ | ○ | ○ | ○ | ○ | ○ | ○                 | 4737 (592 ± 235)  | 20.7 (2.6 ± 0.9) |

○ indicates that imports were made in the corresponding country in the relevant year. Values are total and numbers in parentheses indicate means ± standard errors.
